# Supplementary material
Source: ML conference proceedings conference paper supplement (https://proceedings.neurips.cc/paper_files/paper/2020/hash/70d85f35a1fdc0ab701ff78779306407-Abstract.html)
Supplement: Supplementary file [file 70d85f35a1fdc0ab701ff78779306407-Supplemental.pdf]

## Appendix

Section A provides a proof that isometry preserves angles. Section B derives the closed-form of the gradient projection on the tangent space at a point in the Stiefel manifold. Section C gives further experimental results. Section D lists the grid considered for hyper-parameters.

### A Isometry Preserves Angles

**Theorem A.1.**  *$T$  is an isometry iff it preserves inner products.*

*Proof.* Suppose  $T$  is an isometry. Then for any  $v, w \in V$ ,

$$\begin{aligned} \|T(v) - T(w)\|^2 &= \|v - w\|^2 \\ \langle T(v) - T(w), T(v) - T(w) \rangle &= \langle v - w, v - w \rangle \\ \|T(v)\|^2 + \|T(w)\|^2 - 2\langle T(v), T(w) \rangle &= \|v\|^2 + \|w\|^2 - 2\langle v, w \rangle. \end{aligned}$$

Since  $\|T(u)\| = \|u\|$  for any  $u$  in  $V$ , all the length squared terms in the last expression above cancel out and we get

$$\langle T(v), T(w) \rangle = \langle v, w \rangle.$$

Conversely, if  $T$  preserves inner products, then

$$\langle T(v - w), T(v - w) \rangle = \langle v - w, v - w \rangle,$$

which implies

$$\|T(v - w)\| = \|v - w\|,$$

and since  $T$  is linear,

$$\|T(v) - T(w)\| = \|v - w\|.$$

This shows that  $T$  preserves distance. □

### B Closed-form of Projection in Tangent Space

This section closely follows the arguments of Tagare [2011].

Let  $\{X \in \mathbb{R}^{n \times p} | X^\top X = I\}$  defines a manifold in Euclidean space  $\mathbb{R}^{n \times p}$ , where  $n > p$ . This manifold is called the Stiefel manifold. Let  $\mathcal{T}_X$  denotes a tangent space at  $X$ .

**Lemma B.1.** *Any  $Z \in \mathcal{T}_X$  satisfies:*

$$Z^\top X + X^\top Z = 0$$

i.e.  $Z^\top X$  is a skew-symmetric  $p \times p$  matrix.

Note, that  $X$  consists of  $p$  orthonormal vectors in  $\mathbb{R}^n$ . Let  $X_\perp$  be a matrix consisting of the additional  $n - p$  orthonormal vectors in  $\mathbb{R}^n$  i.e.  $X_\perp$  lies in the orthogonal compliment of  $X$ ,  $X^\top X_\perp = 0$ . The concatenation of  $X$  and  $X_\perp$ ,  $[X X_\perp]$  is  $n \times n$  orthonormal matrix. Then, any matrix  $U \in \mathbb{R}^{n \times p}$  can be represented as:  $U = XA + X_\perp B$ , where  $A$  is a  $p \times p$  matrix, and  $B$  is a  $(n - p) \times p$  matrix.

**Lemma B.2.** *A matrix  $Z = XA + X_\perp B$  belongs to the tangent space at a point on Stiefel manifold  $\mathcal{T}_X$  iff  $A$  is skew-symmetric.*

Let  $G \in \mathbb{R}^{n \times p}$  be the gradient computed at  $X$ . Let the projection of the gradient on the tangent space is denoted by  $\pi_{\mathcal{T}_X}(G)$ .

**Lemma B.3.** *Under the canonical inner product, the projection of the gradient on the tangent space is given by  $\pi_{\mathcal{T}_X}(G) = AX$ , where  $A = GX^\top - XG^\top$ .*

*Proof.* Express  $G = XG_A + X_\perp G_B$ . Let  $Z$  be any vector in the tangent space, expressed as  $Z = XZ_A + X_\perp Z_B$ , where  $Z_A$  is a skew-symmetric matrix according to B.2. Therefore,

$$\begin{aligned}\pi_{\mathcal{T}_X}(G) &= \text{tr}(G^\top Z), \\ &= \text{tr}((XG_A + X_\perp G_B)^\top (XZ_A + X_\perp Z_B)), \\ &= \text{tr}(G_A^\top Z_A + G_B^\top Z_B).\end{aligned}\tag{11}$$

Writing  $G_A$  as  $G_A = \text{sym}(G_A) + \text{skew}(G_A)$ , and plugging in (11) gives,

$$\pi_{\mathcal{T}_X}(G) = \text{tr}(\text{skew}(G_A)^\top Z_A + G_B^\top Z_B).\tag{12}$$

Let  $U = XA + X_\perp B$  is the vector that represents the projection of  $G$  on the tangent space at  $X$ . Then,

$$\begin{aligned}\langle U, Z \rangle_c &= \text{tr}(U^\top (I - \frac{1}{2}XX^\top)Z), \\ &= \text{tr}((XA + X_\perp B)^\top (I - \frac{1}{2}XX^\top)(XZ_A + X_\perp Z_B)), \\ &= \text{tr}(\frac{1}{2}A^\top Z_A + B^\top Z_B)\end{aligned}\tag{13}$$

By comparing (12) and (13), we get  $A = 2\text{skew}(G_A)$  and  $B = G_B$ . Thus,

$$\begin{aligned}U &= 2X\text{skew}(G_A) + X_\perp G_B, \\ &= X(G_A - G_A^\top) + X_\perp G_B, \quad \because \text{skew}(G_A) = \frac{1}{2}(G_A - G_A^\top) \\ &= XG_A - XG_A^\top + G - XG_A, \quad \because G = XG_A + X_\perp G_B \\ &= G - XG_A^\top, \\ &= G - XG^\top X, \quad \because G_A = X^\top G, \\ &= GX^\top X - XG^\top X, \\ &= (GX^\top - XG^\top)X\end{aligned}$$

□

## C More Results

Table 3: Accuracy (2) and Forgetting (3) results of continual learning experiments for larger episodic memory sizes. 2, 3 and 5 samples per class per task are stored, respectively. Top table is for Split CIFAR. Bottom table is for Split minilmageNet.

| METHOD          | ACCURACY            |                     |                     | FORGETTING          |                     |                     |
|-----------------|---------------------|---------------------|---------------------|---------------------|---------------------|---------------------|
|                 | 2                   | 3                   | 5                   | 2                   | 3                   | 5                   |
| AGEM            | 52.2 ( $\pm 2.59$ ) | 56.1 ( $\pm 1.52$ ) | 60.9 ( $\pm 2.50$ ) | 0.16 ( $\pm 0.01$ ) | 0.13 ( $\pm 0.01$ ) | 0.11 ( $\pm 0.01$ ) |
| ER-RING         | 61.9 ( $\pm 1.92$ ) | 64.8 ( $\pm 0.77$ ) | 67.2 ( $\pm 1.72$ ) | 0.11 ( $\pm 0.02$ ) | 0.08 ( $\pm 0.01$ ) | 0.06 ( $\pm 0.01$ ) |
| ORTHOG-SUBSPACE | 64.7 ( $\pm 0.53$ ) | 66.8 ( $\pm 0.83$ ) | 67.3 ( $\pm 0.98$ ) | 0.07 ( $\pm 0.01$ ) | 0.05 ( $\pm 0.01$ ) | 0.05 ( $\pm 0.01$ ) |

  

| METHOD          | ACCURACY            |                     |                     | FORGETTING          |                     |                     |
|-----------------|---------------------|---------------------|---------------------|---------------------|---------------------|---------------------|
|                 | 2                   | 3                   | 5                   | 2                   | 3                   | 5                   |
| AGEM            | 45.2 ( $\pm 2.35$ ) | 47.5 ( $\pm 2.59$ ) | 49.2 ( $\pm 3.35$ ) | 0.14 ( $\pm 0.01$ ) | 0.13 ( $\pm 0.01$ ) | 0.10 ( $\pm 0.01$ ) |
| ER-RING         | 51.2 ( $\pm 1.99$ ) | 53.9 ( $\pm 2.04$ ) | 56.8 ( $\pm 2.31$ ) | 0.10 ( $\pm 0.01$ ) | 0.09 ( $\pm 0.02$ ) | 0.06 ( $\pm 0.01$ ) |
| ORTHOG-SUBSPACE | 53.4 ( $\pm 1.23$ ) | 55.6 ( $\pm 0.55$ ) | 58.2 ( $\pm 1.08$ ) | 0.07 ( $\pm 0.01$ ) | 0.06 ( $\pm 0.01$ ) | 0.05 ( $\pm 0.01$ ) |

## D Hyper-parameter Selection

In this section, we report the hyper-parameters grid considered for experiments. The best values for different benchmarks are given in parenthesis.

- **Multitask**
  - learning rate: [0.003, 0.01, 0.03 (CIFAR, miniImageNet), 0.1 (MNIST perm, rot), 0.3, 1.0]
- **Finetune**
  - learning rate: [0.003, 0.01, 0.03 (CIFAR, miniImageNet), 0.1 (MNIST perm, rot), 0.3, 1.0]
- **EWC**
  - learning rate: [0.003, 0.01, 0.03 (CIFAR, miniImageNet), 0.1 (MNIST perm, rot), 0.3, 1.0]
  - regularization: [0.1, 1, 10 (MNIST perm, rot, CIFAR, miniImageNet), 100, 1000]
- **AGEM**
  - learning rate: [0.003, 0.01, 0.03 (CIFAR, miniImageNet), 0.1 (MNIST perm, rot), 0.3, 1.0]
- **MER**
  - learning rate: [0.003, 0.01, 0.03 (MNIST, CIFAR, miniImageNet), 0.1, 0.3, 1.0]
  - within batch meta-learning rate: [0.01, 0.03, 0.1 (MNIST, CIFAR, miniImageNet), 0.3, 1.0]
  - current batch learning rate multiplier: [1, 2, 5 (CIFAR, miniImageNet), 10 (MNIST)]
- **ER-Ring**
  - learning rate: [0.003, 0.01, 0.03 (CIFAR, miniImageNet), 0.1 (MNIST perm, rot), 0.3, 1.0]
- **ORTHOG-SUBSPACE**
  - learning rate: [0.003, 0.01, 0.03, 0.1 (MNIST perm, rot), 0.2 (miniImageNET), 0.4 (CIFAR), 1.0]

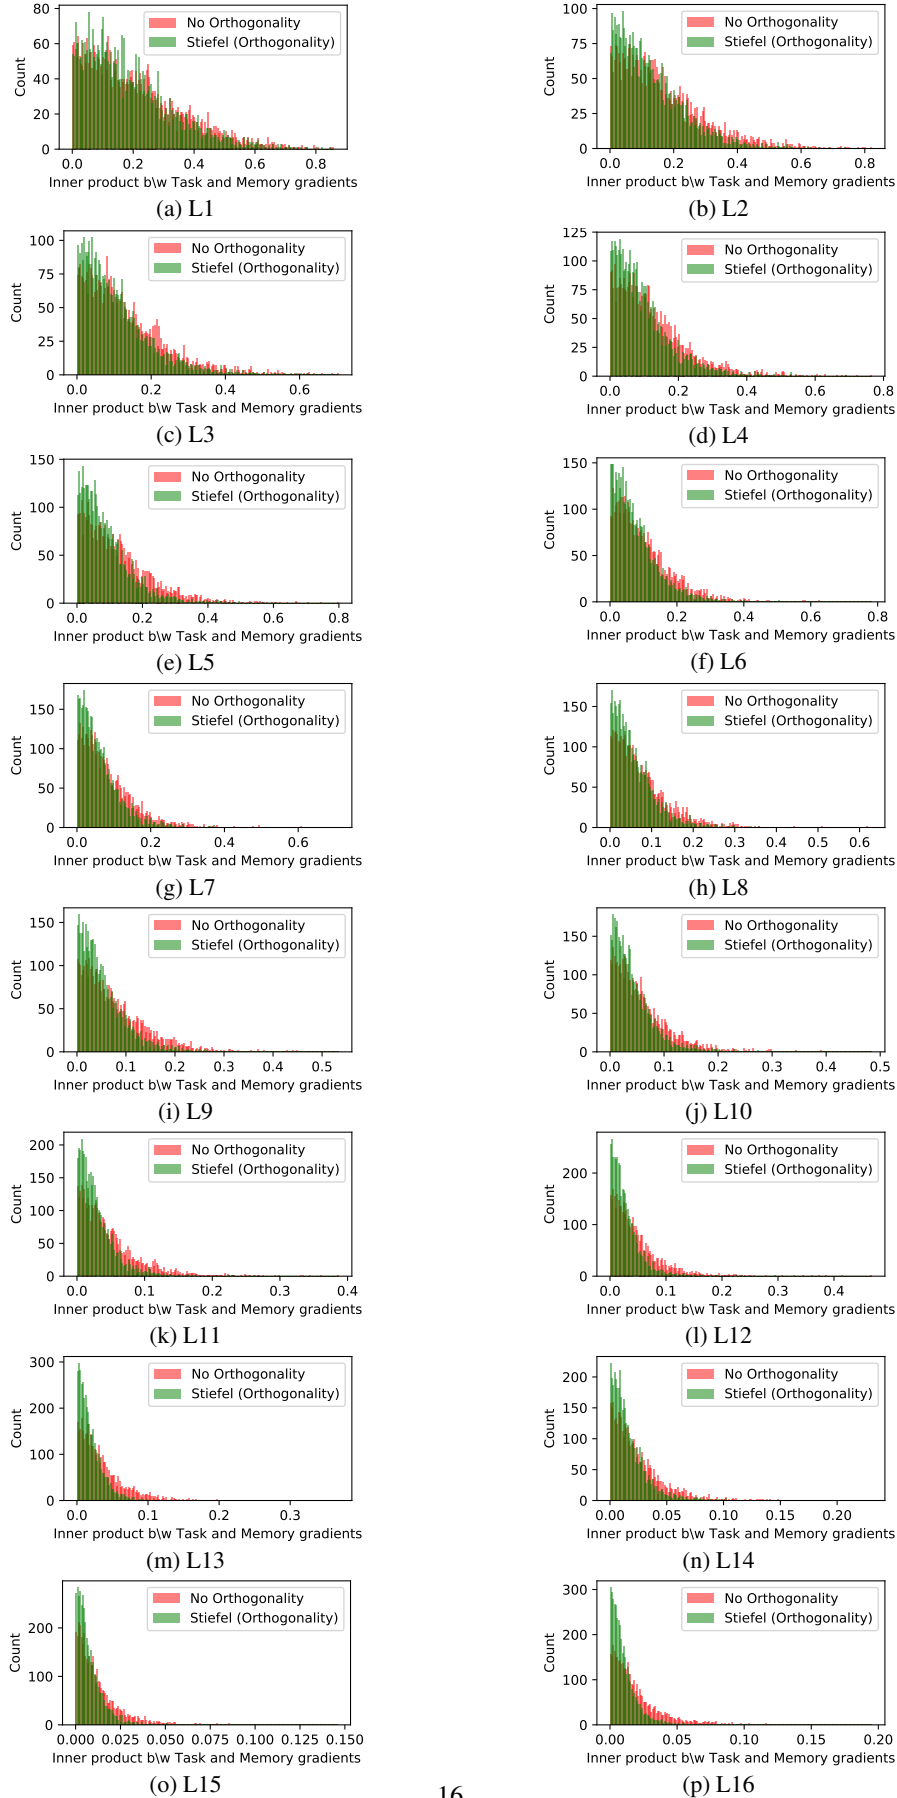

Figure 3: Histogram of inner product of current task and memory gradients in all layers in Split CIFAR.
